# Supplementary material
Source: HighWire-hosted journal article supplement (https://erj.ersjournals.com/content/56/6/2004116)
Supplement: inline-supplementary-material-1 [file inline-supplementary-material-1.pdf]

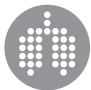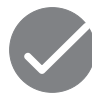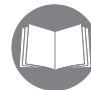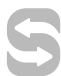

SHAREABLE PDF

# Pandemic trials: evidence-based medicine on steroids

James D. Chalmers

**Affiliation:** Division of Molecular and Clinical Medicine, Ninewells Hospital, Dundee, UK.

**Correspondence:** James D. Chalmers, Division of Molecular and Clinical Medicine, Ninewells Hospital, Dundee, DD1 9SY, UK. E-mail: [jchalmers@dundee.ac.uk](mailto:jchalmers@dundee.ac.uk)

 @ERSpublications

**Small trials have been largely overlooked in the early part of the COVID-19 pandemic in favour of “mega-trials”. As new therapies are urgently needed, phase 2 “proof of concept” studies are crucial as we move into a new phase of pandemic research.** <https://bit.ly/3o0K9kl>

**Cite this article as:** Chalmers JD. Pandemic trials: evidence-based medicine on steroids. *Eur Respir J* 2020; 56: 2004116 [<https://doi.org/10.1183/13993003.04116-2020>].

This single-page version can be shared freely online.

Research is the only exit strategy from current coronavirus disease 2019 (COVID-19) restrictions. The second wave of COVID-19 infections currently affecting most of Europe emphasises that COVID-19, the disease caused by infection with severe acute respiratory syndrome coronavirus 2 (SARS-CoV-2), is likely to require strict control measures impacting on the daily life of most citizens until either a highly effective approach to treatment or effective vaccines are in widespread use [1–3].
